# Supplementary figures and images for: Normative evidence accumulation in unpredictable environments
Source: eLife journal article supplement (doi:10.7554/elife.08825), 2015-08-31

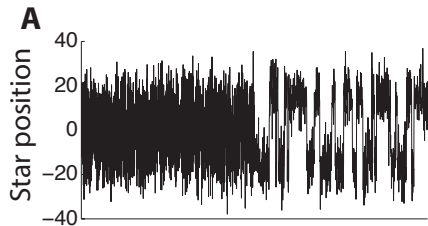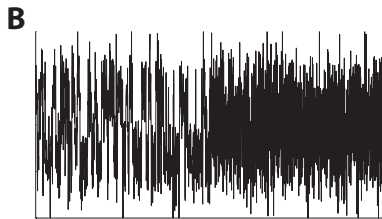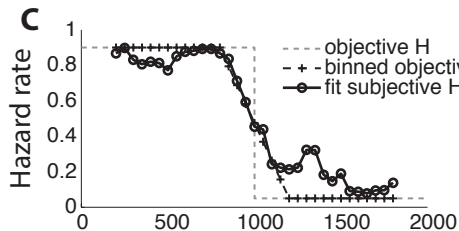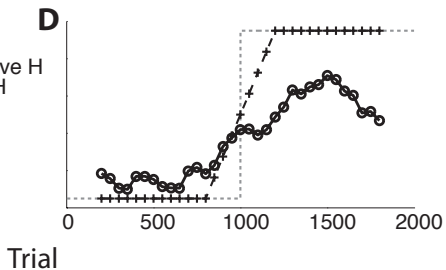

Supplement: supp [file elife-08825-supp-v1.zip]
